# Supplementary material for: Integrating chemical engineering and crystallographic texturing design strategy for the realization of practically viable lead-free sodium bismuth titanate-based incipient piezoceramics
Source: Royal Society of Chemistry journal article supplement (doi:10.1039/d0dt01334j), 2020-01-01
Supplement: d0dt01334j1.pdf [file d0dt01334j1.pdf]

## **Supporting Information:**

### **Integrating Chemical Engineering and Crystallographic Texturing Design Strategy for Realization of Practically Viable Lead-Free Sodium Bismuth Titanate-Based Incipient Piezoceramics**

Wangfeng Bai<sup>\*,†</sup>, Xinyu Zhao<sup>†</sup>, Yanwei Huang<sup>§</sup>, Yuqin Ding<sup>†</sup>, Leijie Wang<sup>†</sup>, Peng  
Zheng<sup>\*,†</sup>, Peng Li<sup>‡</sup>, Jiwei Zhai<sup>\*,⊥</sup>

<sup>†</sup> College of Materials and Environmental Engineering, Hangzhou Dianzi University,  
Hangzhou, 310018, China

<sup>‡</sup> College of Materials Science and Engineering, Liaocheng University, Liaocheng,  
252059, China

<sup>§</sup> State Key Laboratory of Precision Spectroscopy, East China Normal University,  
Shanghai, 200062 China

<sup>⊥</sup>Functional Materials Research Laboratory, School of Materials Science &  
Engineering, Tongji University, No. 4800 Caoan Highway, Shanghai 201804, China

#### **\*Corresponding authors:**

\*E-mail address: bwfcxj@126.com (W. Bai)

\*E-mail address: zhengpeng@hdu.edu.cn (P. Zheng)

\*E-mail address: apzhai@tongji.edu.cn (J. Zhai)

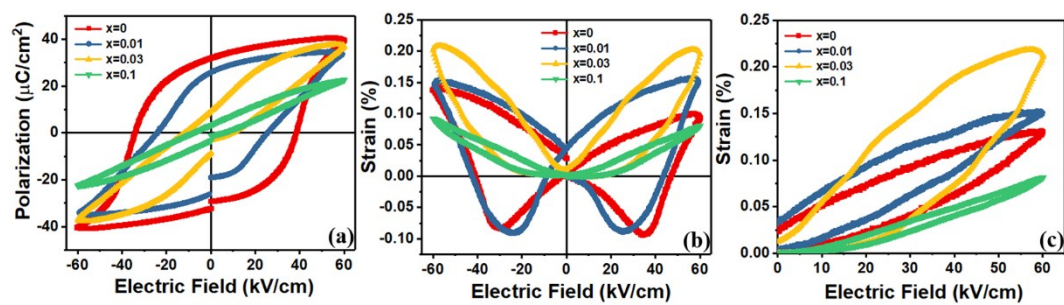

**Figure S1.** (a) Polarization hysteresis, (b) bipolar strain, and (c) unipolar strain loops for the BNT-BT-NN ceramics with different NN content prepared by CSSR method.

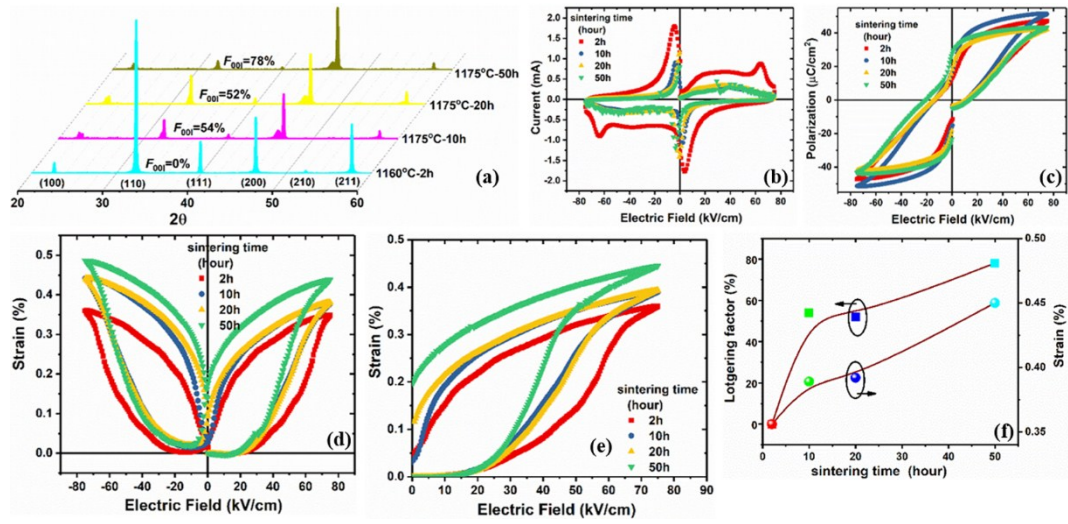

**Figure S2.** (a) XRD patterns, (b) field-current curves, (c) polarization hysteresis loops, (d) bipolar strain curves, (e) unipolar strain curves, and (f) strain values and Lotgering factor of BNT-BT-NN ceramics with respect to sintering time.

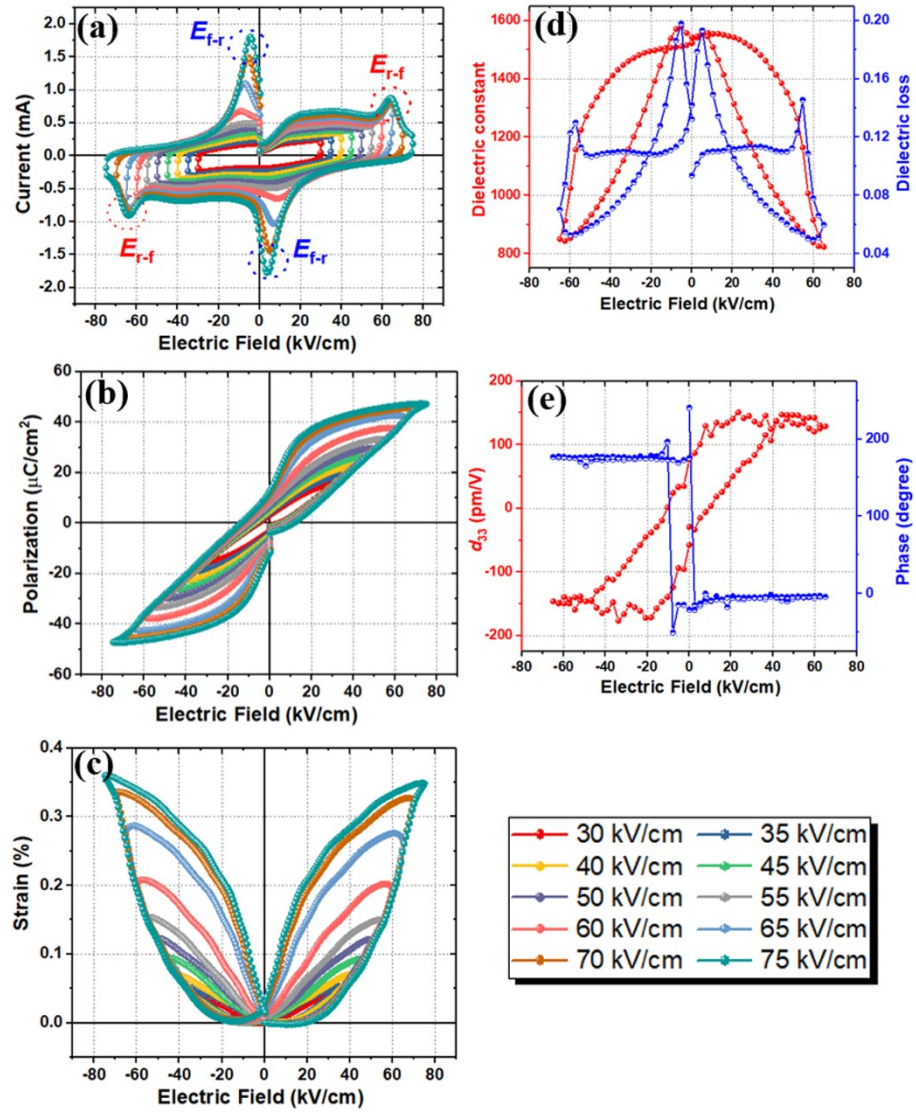

**Figure S3.** Electric field-dependent (a) current-field curves, (b) polarization hysteresis loops, (c) bipolar strain curves, (d) dielectric constant and loss, and (e) piezoelectric strain coefficient and phase curves for the random ceramics.

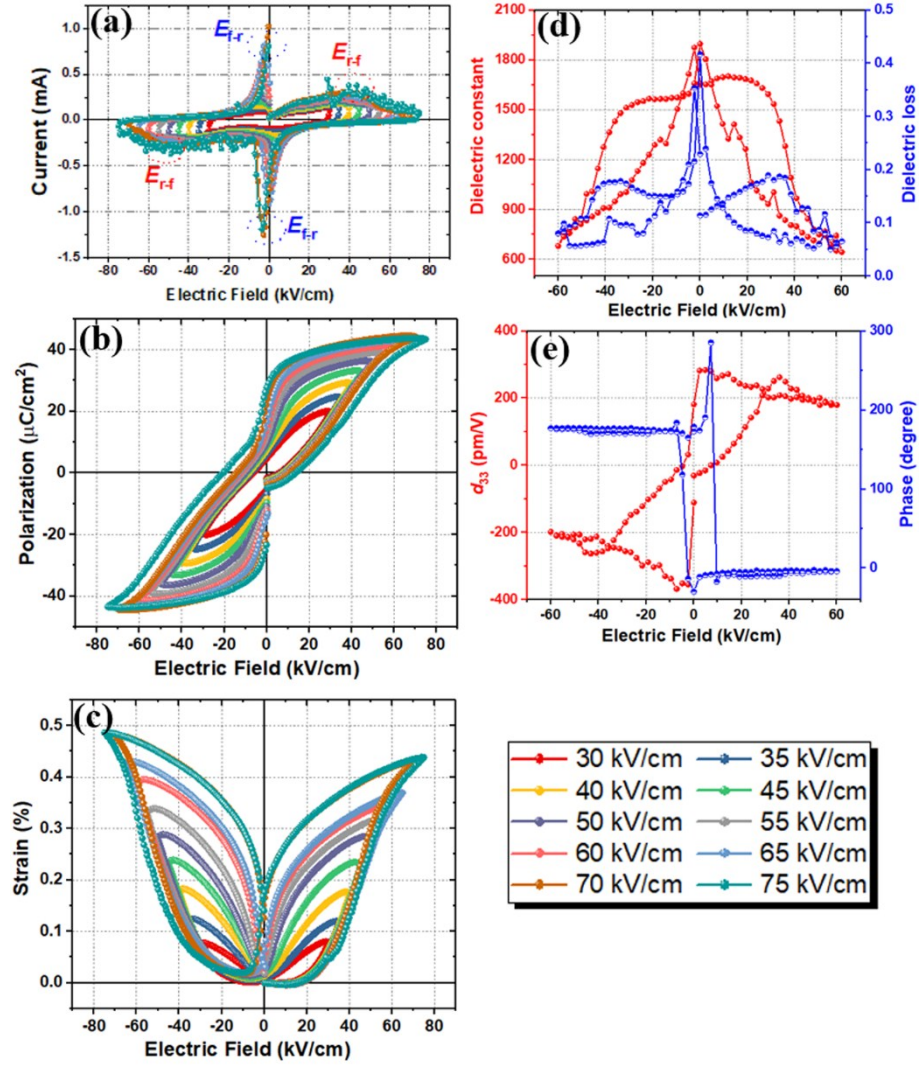

**Figure S4.** Electric field-dependent (a) current-field curves, (b) polarization hysteresis loops, (c) bipolar strain curves, (d) dielectric constant and loss, and (e) piezoelectric strain coefficient and phase curves for the oriented ceramics.

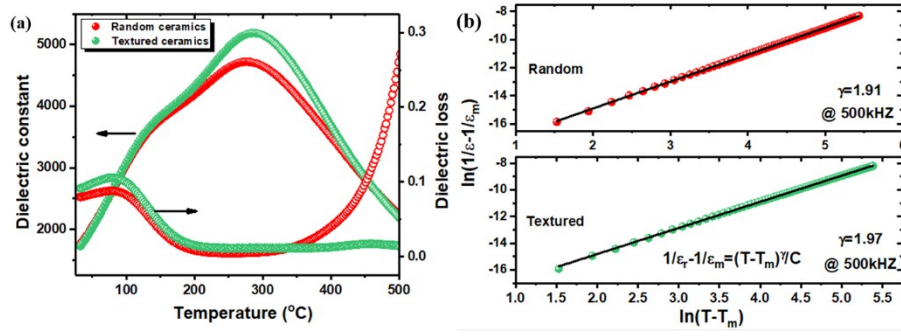

**Figure S5.** (a) Dielectric constant and loss as a function of temperature, and (b) the diffuseness parameter  $\gamma$  for the poled random and textured ceramics. The *insert* is the modified Curie-Weiss equation.

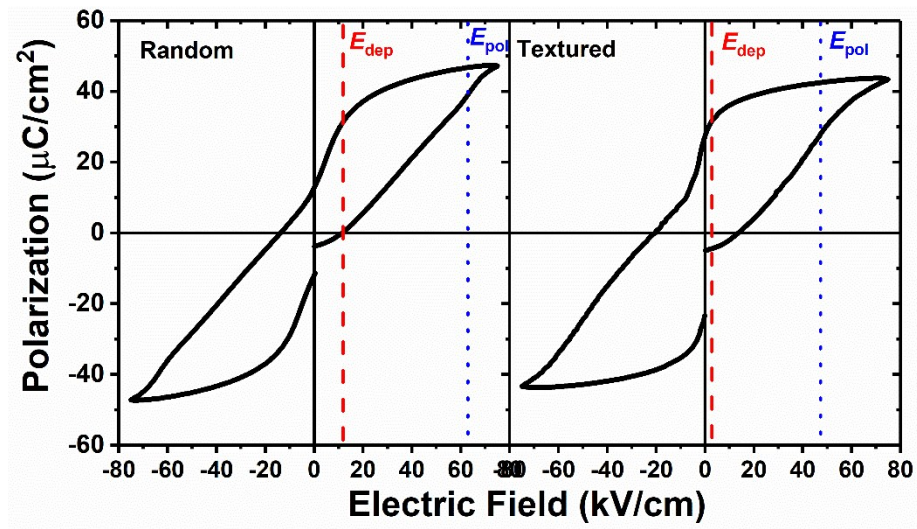

**Figure S6.** Polarization hysteresis loops of random and textured ceramics measured at 75kV/cm. The inflection point during uphill and downhill cycle corresponds to the  $E_{\text{dep}}$  and  $E_{\text{pol}}$ , respectively.



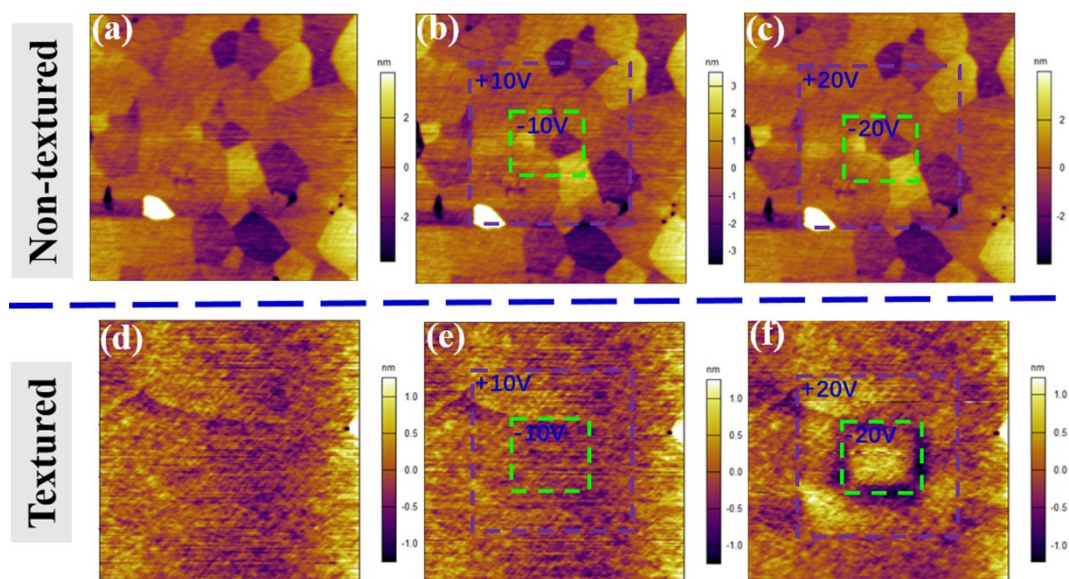

**Figure S7.** Morphology of randomly oriented and oriented BNT-BT-NN ceramics.



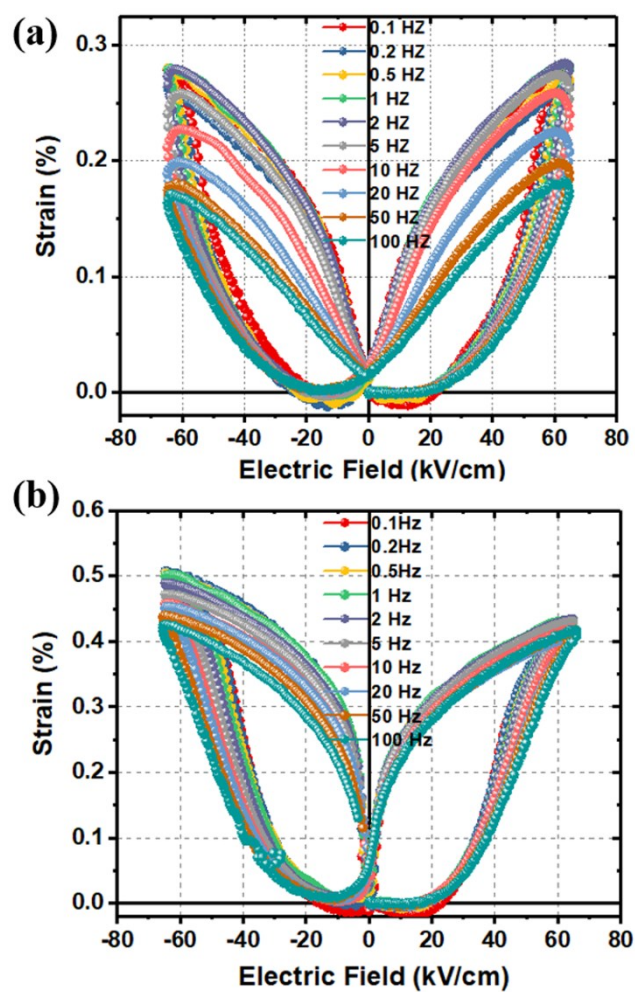

**Figure S8.** Frequency-dependent bipolar strain curves for (a) random and (b) textured BNT-BT-NN ceramics.

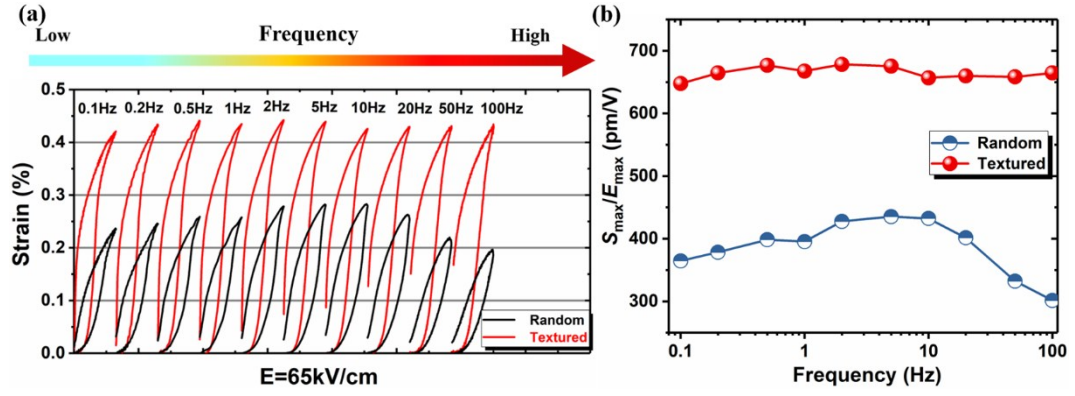

**Figure S9.** (a)Field-induced unipolar strain of the non-textured and textured BNT-BT-NN ceramics under different measuring frequency, and (b) the change of normalized  $S_{\max}/E_{\max}$  as a function of measuring frequency.

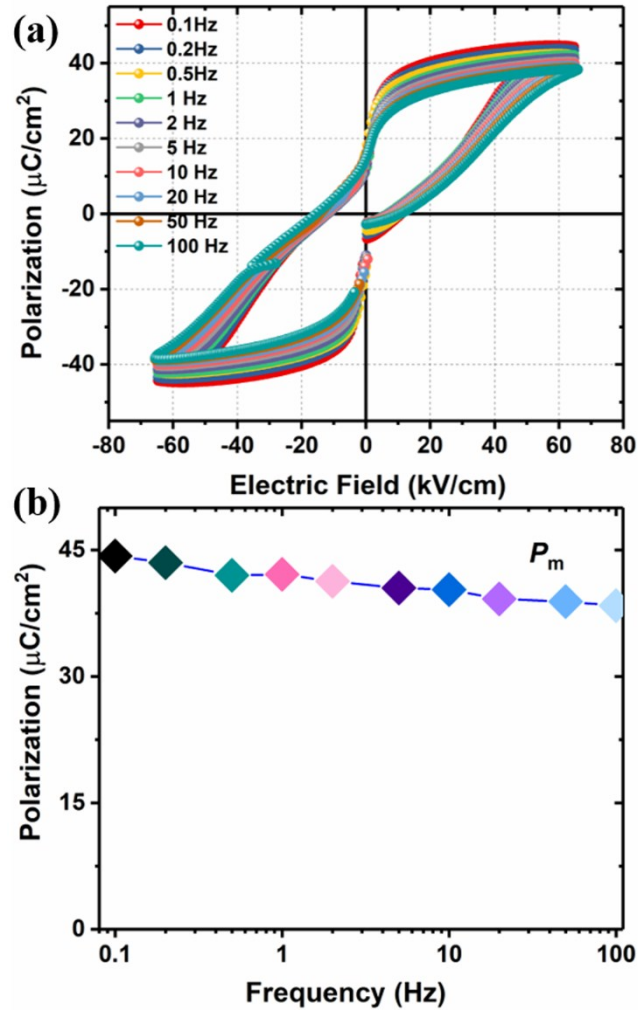

**Figure S10.** (a) Frequency-dependent polarization hysteresis loops, and (b) the variation in  $P_m$  with respect to frequency for the textured BNT-BT-NN sample.

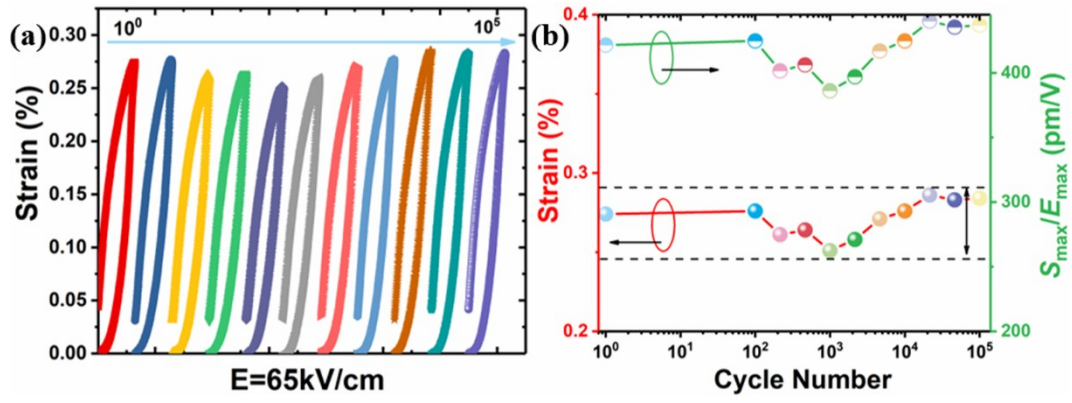

**Figure S11.** (a) Unipolar strain curves with respect to cycle numbers, and (b) the change of unipolar strain and normalized  $S_{\text{max}}/E_{\text{max}}$  as a function of cycle numbers for the random BNT-BT-NN ceramics.

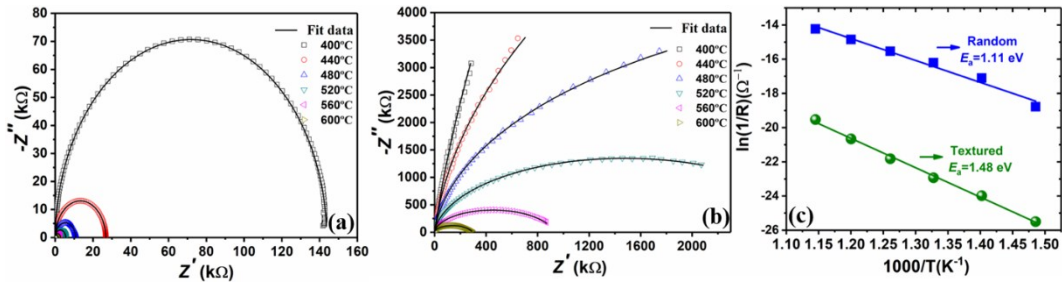

**Figure S12.** Complex impedance spectra of (a) random and (b) textured BNT-BT-NN ceramics measured at 400°C-600°C from 100Hz to 10MHz. (c) The change of bulk resistance with inverse of temperature. The activation energy  $E_a$  was determined using the Arrhenius law:  $\sigma = \sigma_0 \exp(-E_a/kT)$ , where  $\sigma_0$  represents the pre-exponent constant and  $k$  is Boltzmann constant.
